# Supplementary material
Source: publisher figshare collection journal article supplement (https://wiley.figshare.com/articles/dataset/_/3562002)
Supplement: Supplementary file 1 [file 1]

## Appendix A – Reparameterizing the spatial and nonspatial Gompertz models as autoregressive models

### Nonspatial Gompertz model

The nonspatial Gompertz model can be reparameterized as an autoregressive model:

$$\log(\mathbf{n}) = \frac{\omega}{1-\rho} + \phi\rho^{(t-1)} + \boldsymbol{\psi} \quad (\text{A.1})$$

where  $\mathbf{t}$  is the vector of years  $\langle 1, 2, \dots, T \rangle$  and  $T$  is the maximum year,  $\mathbf{n}$  is the vector of population abundances  $\langle n_1, n_2, \dots, n_T \rangle$ , and  $\boldsymbol{\psi}$  is the vector of process variability  $\langle \psi_1, \psi_2, \dots, \psi_T \rangle$ :

$$\boldsymbol{\psi} \sim MVN(\mathbf{0}, \boldsymbol{\Sigma}_\psi) \quad (\text{A.2})$$

where  $\boldsymbol{\Sigma}_\psi$  is temporal covariation, calculated as a function of process variance  $\sigma_\psi^2$  and the autoregressive coefficient  $\rho$  (Clark 2007):

$$\boldsymbol{\Sigma}_\psi = \frac{\sigma_\psi^2}{1-\rho^2} \begin{bmatrix} 1 & \rho & \rho^2 & \cdot & \rho^{T-1} \\ \rho & 1 & \rho & \cdot & \rho^{T-2} \\ \rho^2 & \rho & 1 & \cdot & \rho^{T-3} \\ \cdot & \cdot & \cdot & \cdot & \cdot \\ \rho^{T-1} & \rho^{T-2} & \rho^{T-3} & \cdot & 1 \end{bmatrix} \quad (\text{A.3})$$

and where  $\psi_t$  in the autoregressive parameterization (Eq. 3a) equals  $\varepsilon_t/\text{sqrt}(1-\rho^2)$  from the recursive parameterization (Eq. 1a).

### Spatial Gompertz model

Similarly, the spatial Gompertz model can be re-parameterized as a vector autoregressive model:

$$\log(\mathbf{D}) = \frac{\alpha + \boldsymbol{\Omega}}{1-\rho} + \phi\rho^{(t-1)} + \boldsymbol{\Psi} \quad (\text{A.4})$$

where  $\boldsymbol{\Omega}$  is as defined previously, and  $\boldsymbol{\Psi}$  now represents spatiotemporal error (i.e., the autoregressive structure for the vector autoregressive model):

$$\Psi \sim MVN(0, \Sigma_E \otimes \Sigma_\psi) \tag{A.5}$$

where  $\Sigma_E$  and  $\Sigma_\psi$  are as defined previously. Here,  $\Sigma_E \otimes \Sigma_\psi$  is a Kronecker product which results in a sparse-matrix representation of the precision (inverse covariance) matrix of  $\Psi$  (which is advantageous from a computational perspective).

LITERATURE CITED

Clark, J. S. 2007. *Models for Ecological Data: An Introduction*. Princeton University Press,  
Princeton, New Jersey, USA.
